# Supplementary material for: In situ synthesis of CdS@NH2-MIL-125 nanocomposite for the enhanced photocatalytic oxidative desulfurization of dibenzothiophene
Source: Royal Society of Chemistry journal article supplement (doi:10.1039/d2cy01837c), 2022-12-12
Supplement: d2cy01837c1.pdf [file d2cy01837c1.pdf]

## Supporting Information

### **In Situ Synthesis of CdS@NH<sub>2</sub>-MIL-125 Nanocomposite for Enhanced Photocatalytic Oxidative Desulfurization of Dibenzothiophene**

Mona Hosseini-Sarvari<sup>\*a</sup>, Saeede Saki<sup>a</sup>, Yanlong Gu<sup>b</sup>, Dengyue Zheng<sup>b</sup>

<sup>a</sup>*Nano Photocatalysis Lab, Department of Chemistry, Shiraz University, Shiraz 7194684795,  
I.R. Iran*

<sup>b</sup>*Institute of Physical Chemistry and Industrial Catalysis, School of Chemistry and Chemical  
Engineering, Huazhong University of Science and Technology, Luoyu Road 1037#, Hongshan  
District, Wuhan, 430074, P.R.China*

<sup>\*</sup> *Corresponding author, E-mail address: [hossaini@shirazu.ac.ir](mailto:hossaini@shirazu.ac.ir) (Mona Hosseini-Sarvari)*

| <b>Table of contents</b>                                                             | <b>Pages</b> |
|--------------------------------------------------------------------------------------|--------------|
| 1. Photocatalysts characterization .....                                             | S3           |
| 2. Optimization of reaction conditions .....                                         | S3           |
| 3. HPLC chromatograms in the photocatalytic oxidative desulfurization of (DBT) ..... | S4           |
| 4. References.....                                                                   | S23          |

## 1. Photocatalyst characterization

**Table S1.** Results of bandgap calculation for synthesis photocatalysts

| Photocatalyst name           | Bandgap (eV) |
|------------------------------|--------------|
| CdS                          | 2.1          |
| NH <sub>2</sub> -MIL-125     | 2.6          |
| CdS@NH <sub>2</sub> -MIL-125 | 2.52         |

## 2. Optimization of reaction conditions

**Table S2: Solvent Screening** <sup>[a]</sup>

| Entry | Solvent                             | DBT removal percent (%) |
|-------|-------------------------------------|-------------------------|
| 1     | Toluene                             | 76.8                    |
| 2     | <i>n</i> -Octane                    | 3.5                     |
| 3     | <i>n</i> -Heptane                   | 2                       |
| 4     | CH <sub>3</sub> CN                  | 56 (after 3 days)       |
| 5     | EtOH                                | 82 (after 3 days)       |
| 6     | DMSO                                | 3                       |
| 7     | THF                                 | 26.2                    |
| 8     | MeOH                                | 2                       |
| 9     | <i>n</i> -Octane/CH <sub>3</sub> CN | 6.5                     |
| 10    | Toluene/ CH <sub>3</sub> CN         | 27                      |
| 11    | EtOH/ CH <sub>3</sub> CN            | 12                      |
| 12    | EtOH/ H <sub>2</sub> O              | 5.5                     |
| 13    | Toluene/H <sub>2</sub> O            | 15                      |
| 14    | Toluene/EtOH                        | 20                      |

<sup>[a]</sup> Reaction conditions: CdS@NH<sub>2</sub>-MIL-125 (20 mg), t = 24 h, T = r.t, DBT = 100 ppm, 12 W blue LED under oxygen gas.

### 3. HPLC chromatograms in the photocatalytic oxidative desulfurization of DBT

The concentration obtained of DBT after the reaction was determined by reversed-phase HPLC on an Agilent 1100 using Merck SP-18 column and Lichrospher C-18 bonded packing. The mobile phase was acetonitrile and water (75/25 V/V) and UV detector at 245 nm with a flow rate of 0.8 mL/min. An external standard of DBT was found to elute under these conditions at 6.7 min according to the method used in reference [1]. It seems that the peak appeared in retention time of 3.15-3.40 is related to DBT sulfone. Thus DBT sulfone obtained by the photo-oxidation was found to elute around 3.15-3.40 min [1].

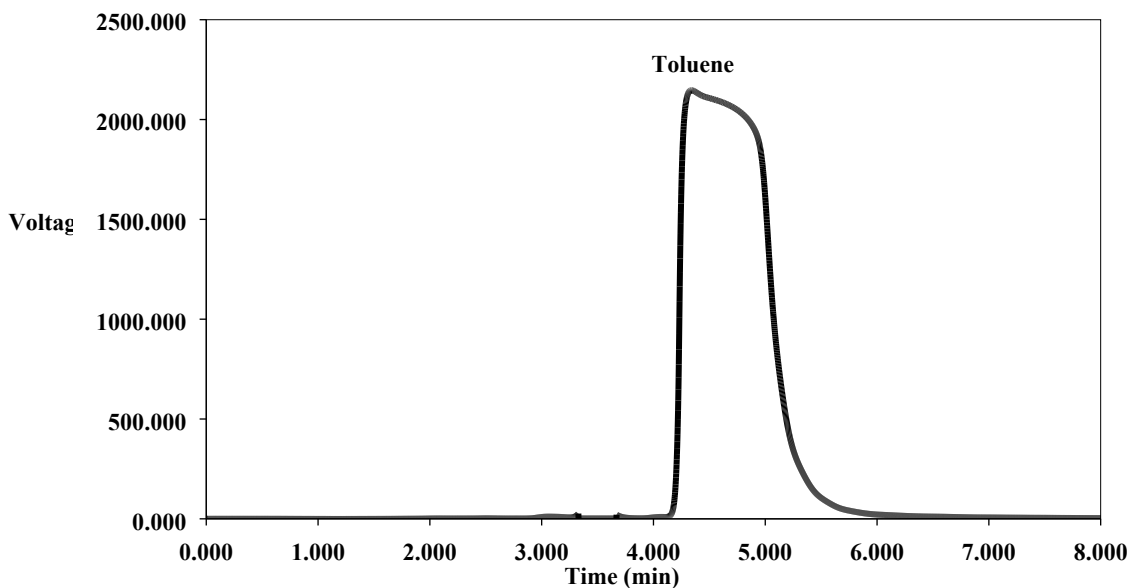

**Figure S1.** HPLC Chromatogram of toluene as solvent (retention time 4.145-5.79 min).

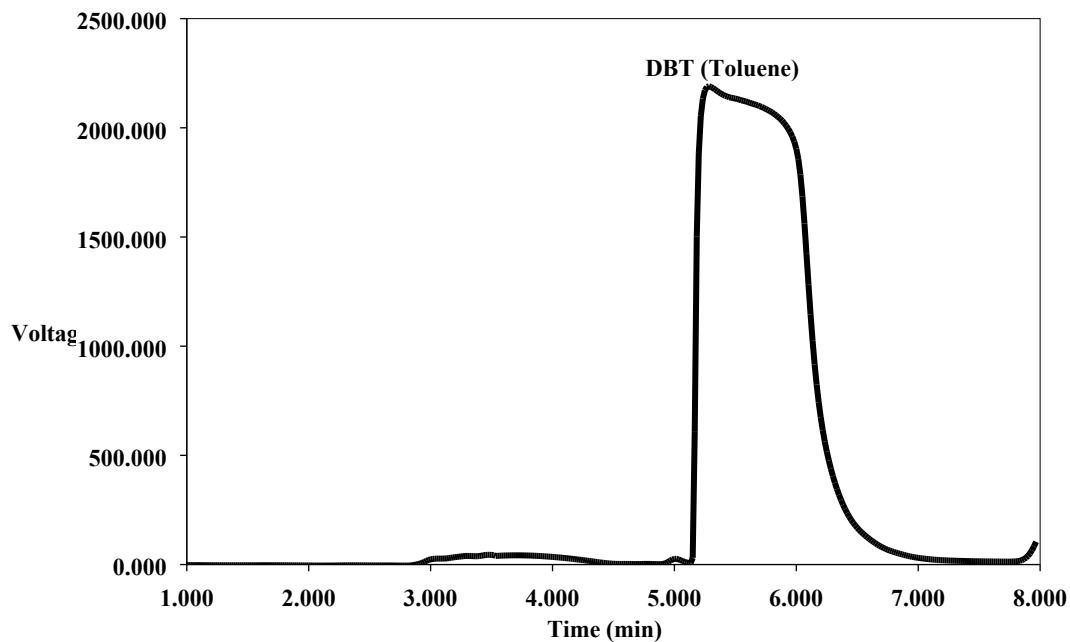

**Figure S2.** HPLC Chromatogram of 100 ppm standard of DBT in toluene (retention time 5.5-6.7 min).

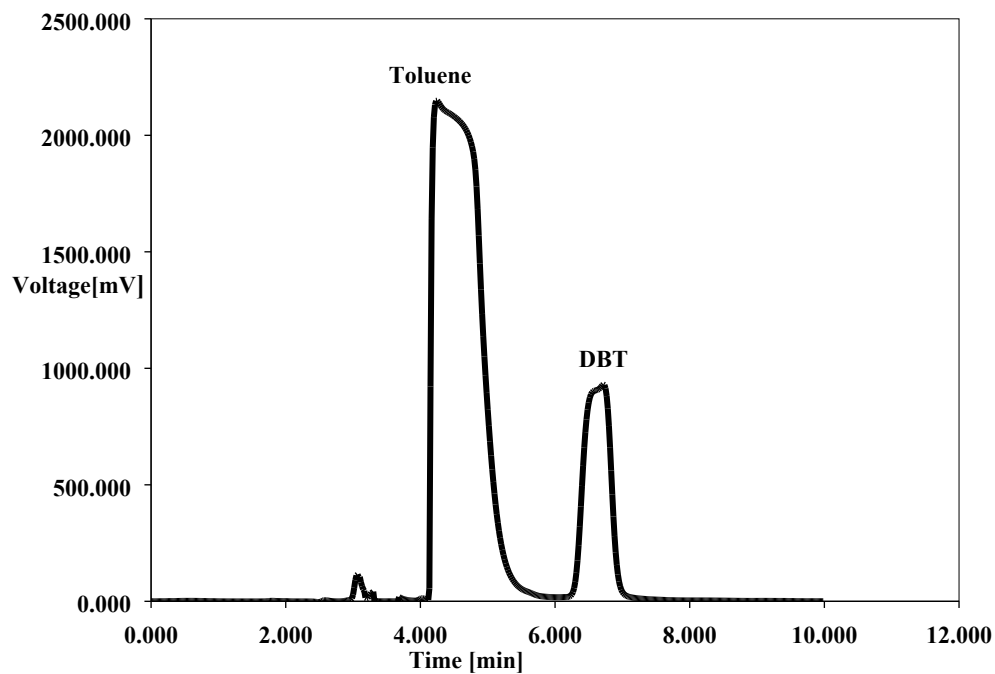

**Figure S3.** HPLC Chromatogram [Reaction condition: Without catalyst, t = 24 h, T = r.t, DBT = 100 ppm, solvent = Toluene, 12 W blue LED, under oxygen gas]

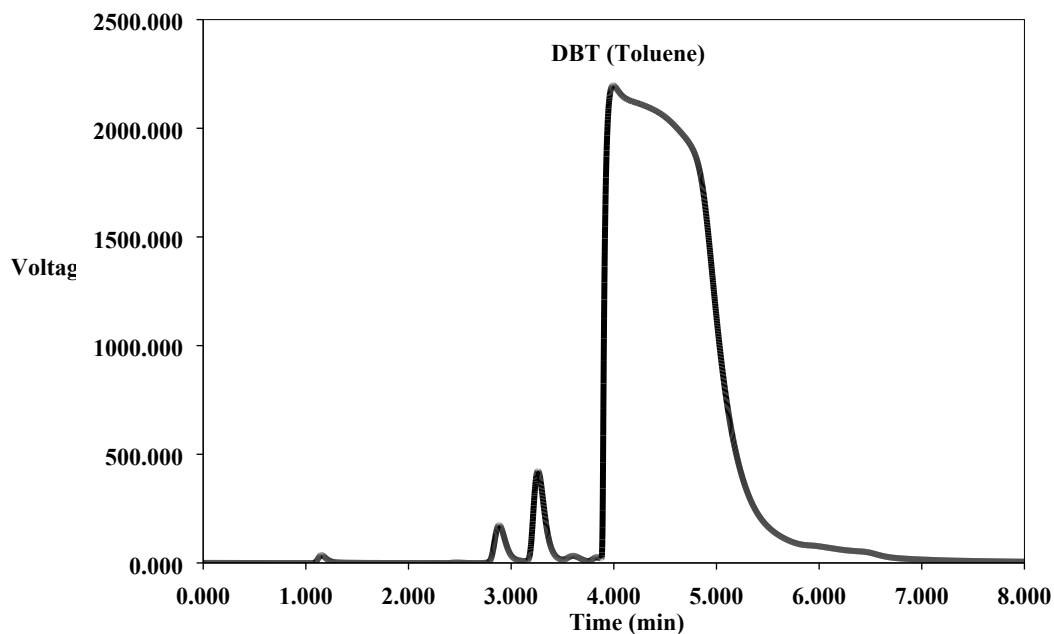

**Figure S4.** HPLC Chromatogram [Reaction condition: 20 mg CdS@NH<sub>2</sub>-MIL-125, t = 24 h, T = r.t, DBT = 100 ppm, solvent = Toluene, for 2 h in the dark and under oxygen gas], (Retention time 3.30 min)

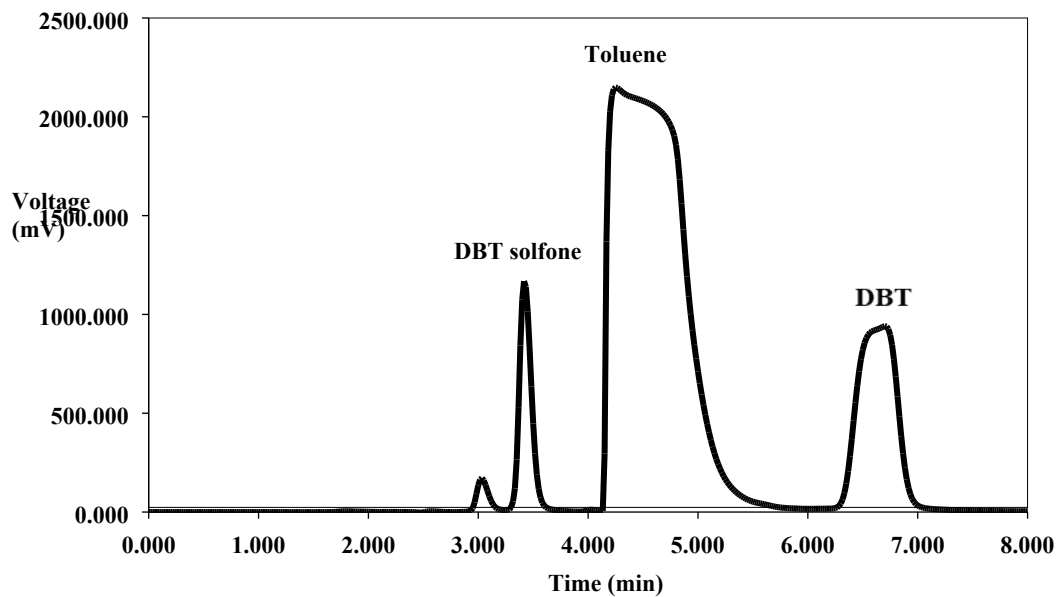

**Figure S5.** HPLC Chromatogram [Reaction condition: 20 mg CdS@NH<sub>2</sub>-MIL-125, t = 24 h, T = r.t, DBT = 100 ppm, solvent = Toluene, for 5 h under visible light irradiation and oxygen gas] (Retention time 3.43 min).

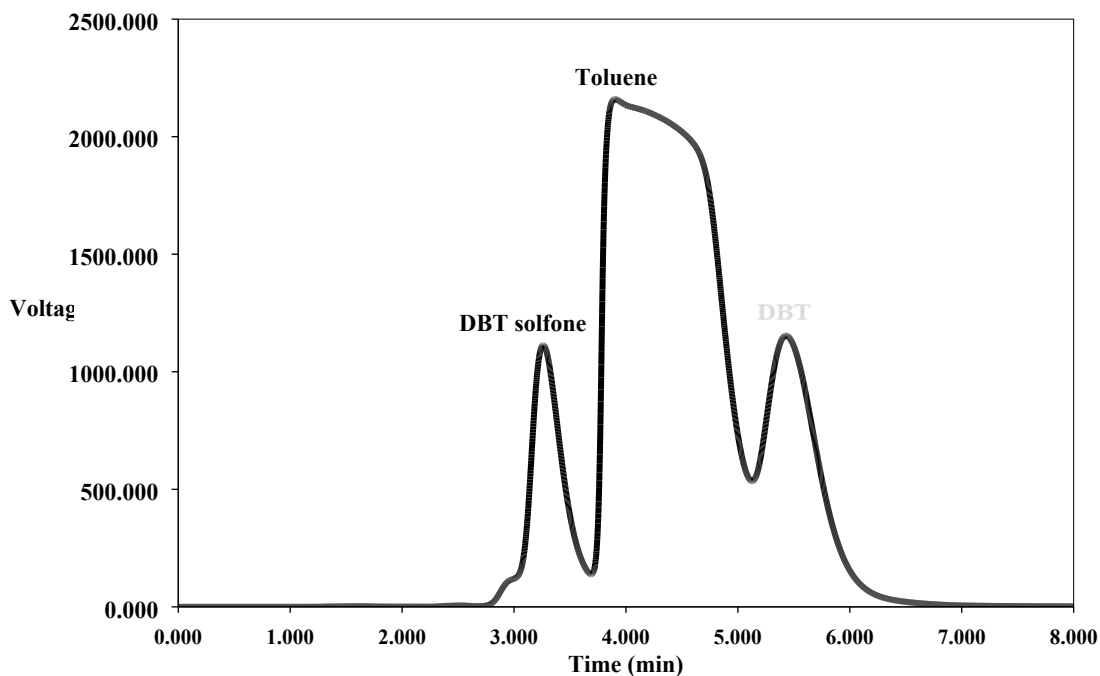

**Figure S6.** HPLC Chromatogram [Reaction condition: 20 mg CdS@NH<sub>2</sub>-MIL-125, t = 24 h, T = r.t, DBT = 100 ppm, solvent = Toluene, for 8 h under visible light irradiation and oxygen gas] (Retention time 3.30 min).

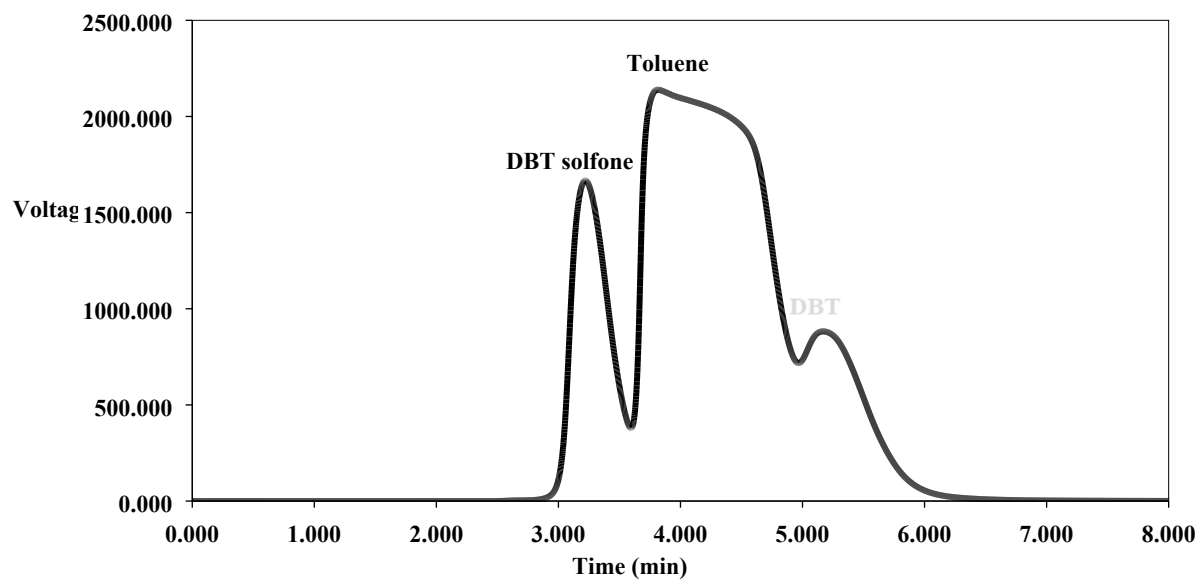

**Figure S7.** HPLC Chromatogram [Reaction condition: 20 mg CdS@NH<sub>2</sub>-MIL-125, t = 24 h, T = r.t, DBT = 100 ppm, solvent = Toluene, for 12 h under visible light irradiation and oxygen gas] (Retention time 3.28 min).

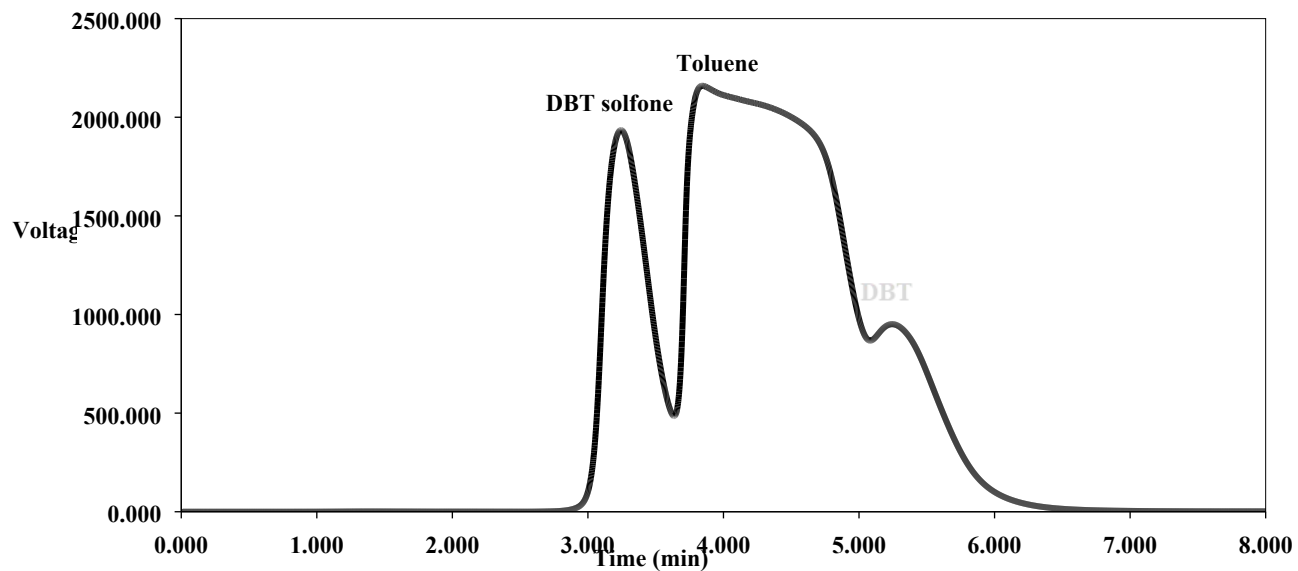

**Figure S8.** HPLC Chromatogram [Reaction condition: 20 mg CdS@NH<sub>2</sub>-MIL-125, t = 24 h, T = r.t, DBT = 100 ppm, solvent = Toluene, for 17 h under visible light irradiation and oxygen gas] (Retention time 3.28 min).

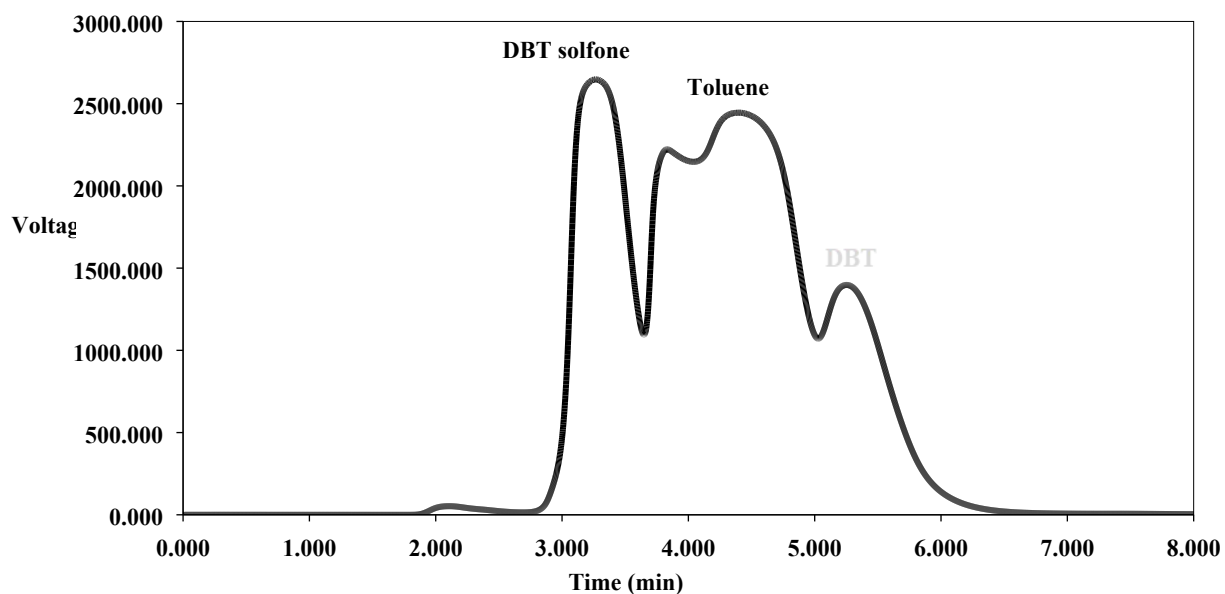

**Figure S9.** HPLC Chromatogram [Reaction condition: 20 mg CdS@NH<sub>2</sub>-MIL-125, t = 24 h, T = r.t, DBT = 100 ppm, solvent = Toluene, for 20 h under visible light irradiation and oxygen gas] (Retention time 3.30 min).



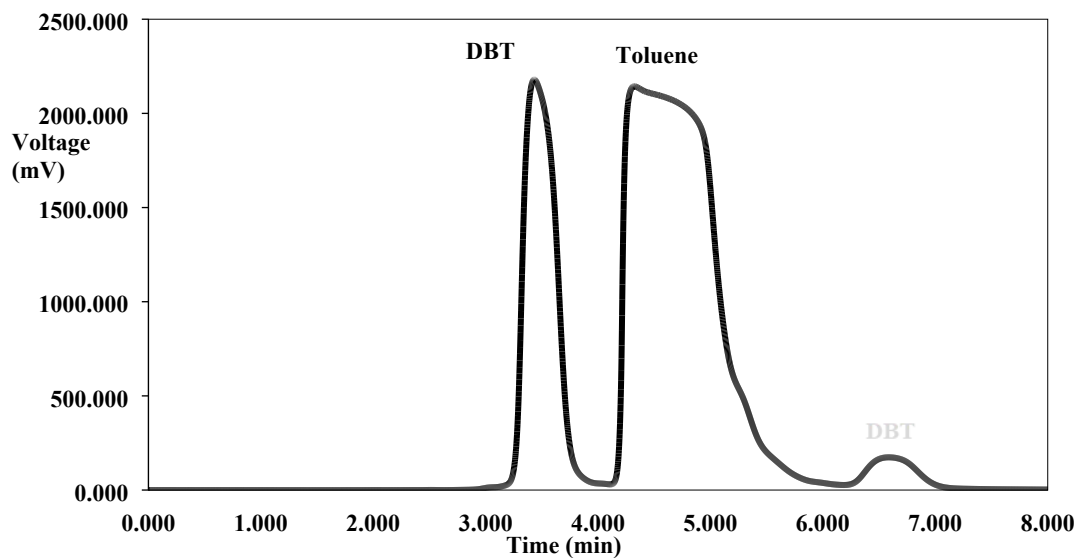

**Figure S10.** HPLC Chromatogram [Reaction condition: 20 mg CdS@NH<sub>2</sub>-MIL-125, t = 24 h, T = r.t, DBT = 100 ppm, solvent = Toluene, for 24 h under visible light irradiation and oxygen gas] (Retention time 3.40 min).

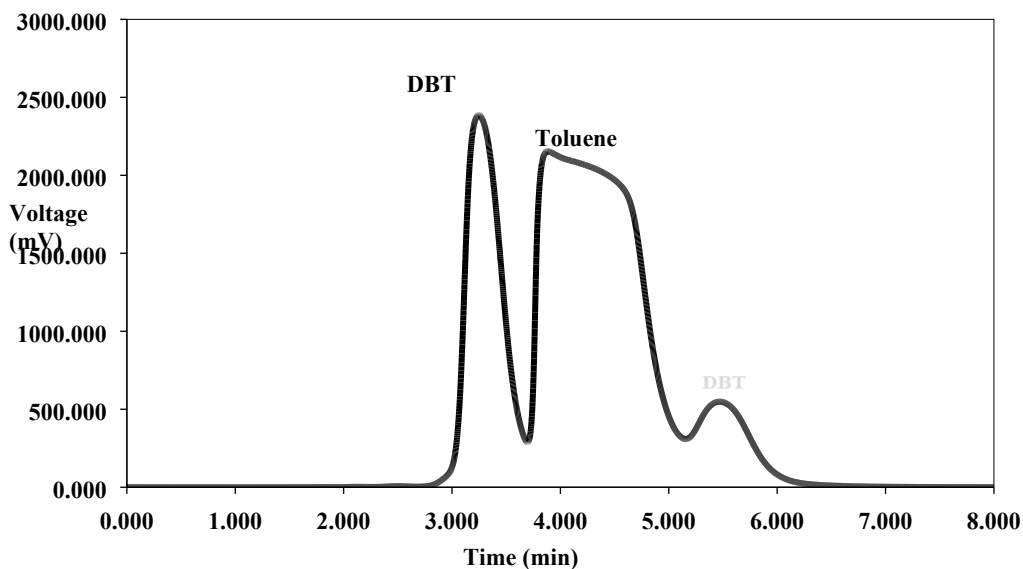

**Figure S11.** HPLC Chromatogram [Reaction condition: 20 mg CdS@NH<sub>2</sub>-MIL-125, t = 24 h, T = r.t, DBT = 100 ppm, solvent = Toluene, for 26 h under visible light irradiation and oxygen gas] (Retention time 3.28 min).

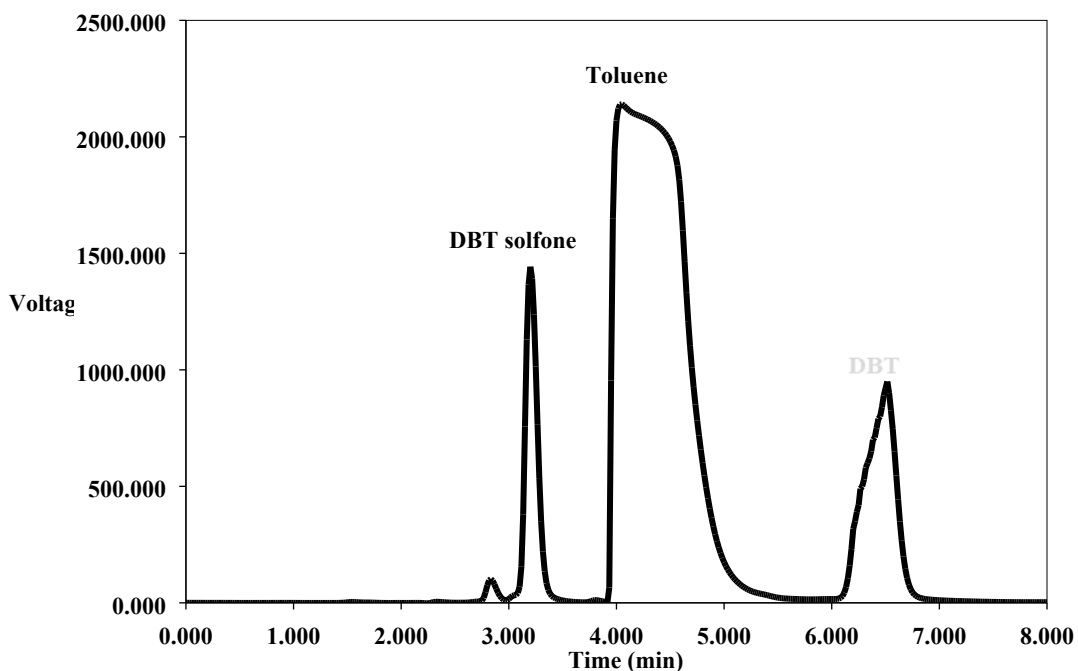

**Figure S12.** HPLC Chromatogram [Reaction condition: 5 mg CdS@NH<sub>2</sub>-MIL-125, , t = 24 h, T = r.t, DBT = 100 ppm, solvent = Toluene, 12 W blue LED, under oxygen gas] (Retention time 3.21 min)

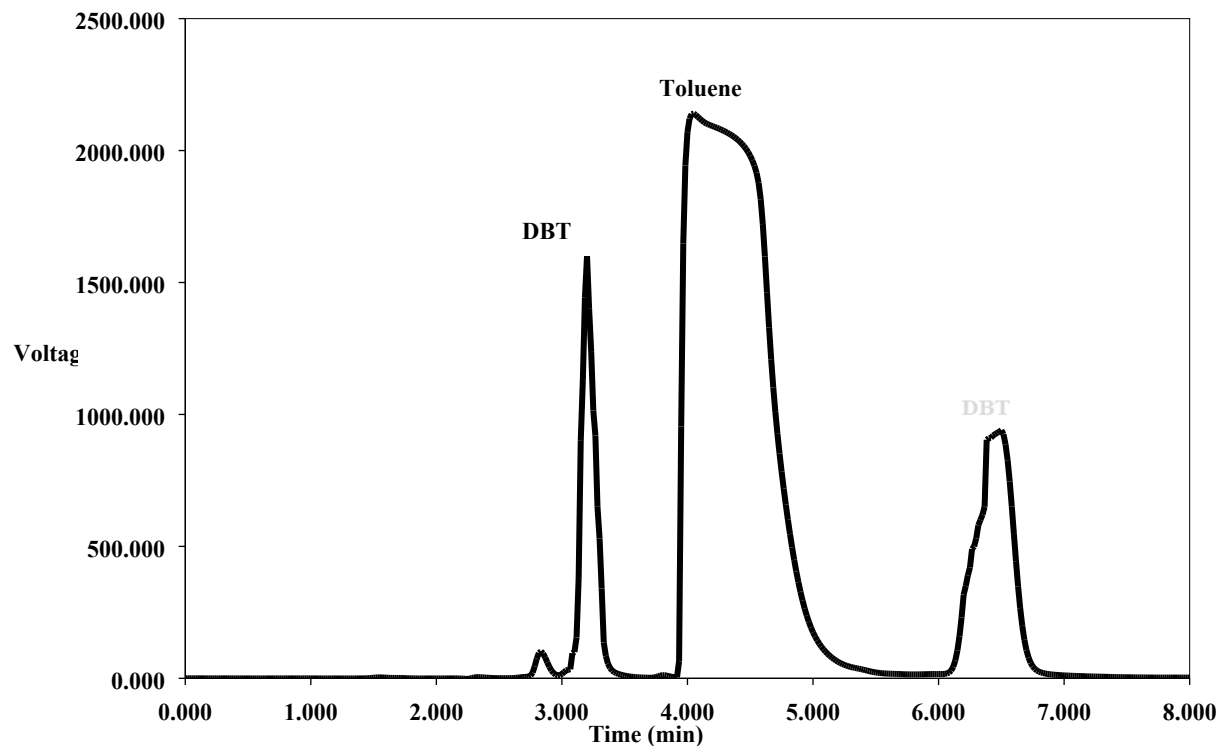

**Figure S13.** HPLC Chromatogram [Reaction condition: 10 mg CdS@NH<sub>2</sub>-MIL-125, t = 24 h, T = r.t, DBT = 100 ppm, solvent = Toluene, 12 W blue LED, under oxygen gas] (Retention time 3.18 min)

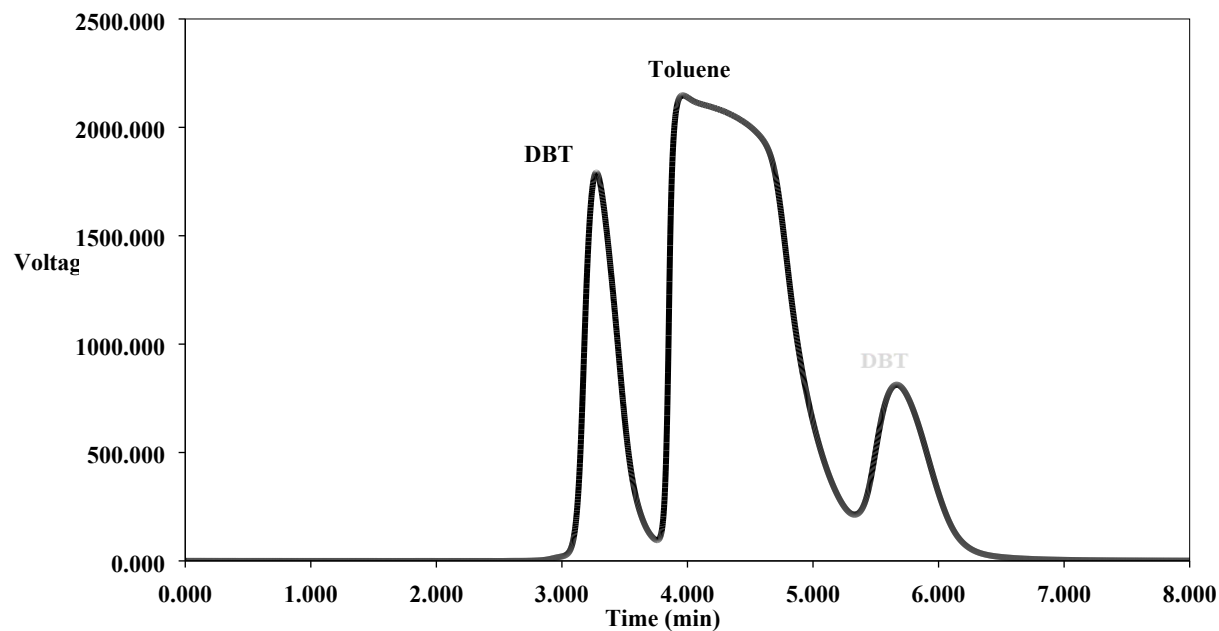

**Figure S14.** HPLC Chromatogram [Reaction conditions: 15 mg CdS@NH<sub>2</sub>-MIL-125, t = 24 h, T = r.t, DBT = 100 ppm, solvent = Toluene, 12 W blue LED, under oxygen gas]

(Retention time 3.18 min)

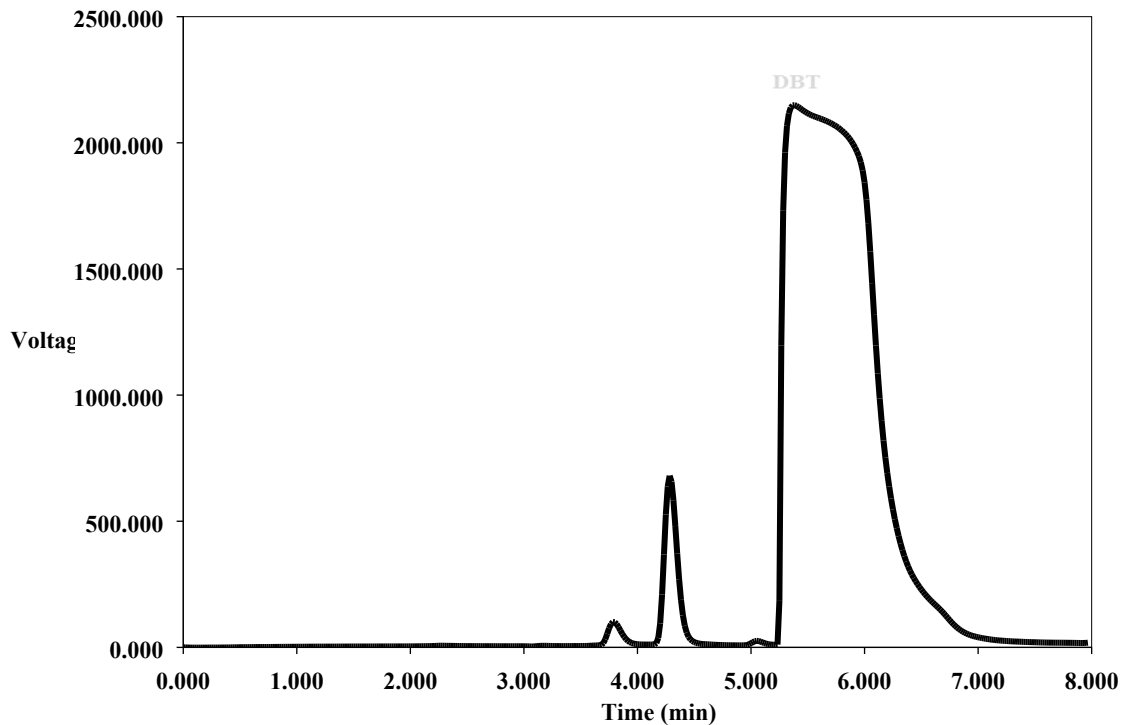

**Figure S15.** HPLC Chromatogram in dark conditions [Reaction condition: 20 mg CdS@NH<sub>2</sub>-MIL-125, t = 24 h, T = r.t, DBT = 100 ppm, solvent = Toluene, 12 W blue LED, under oxygen gas]

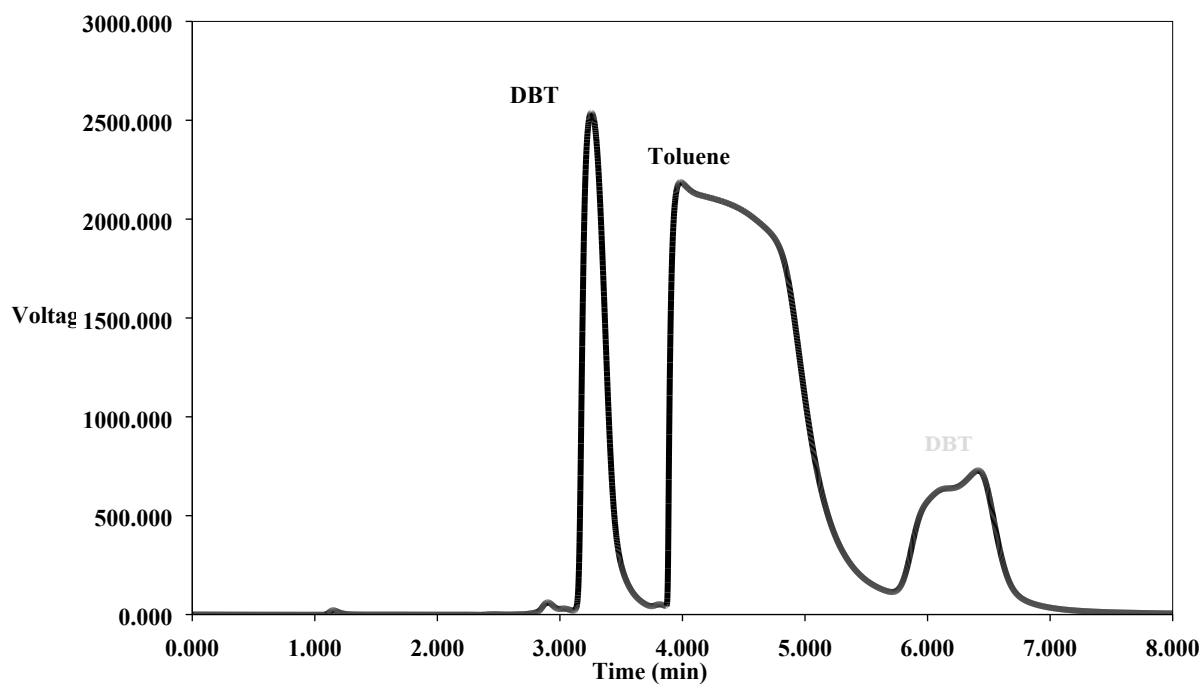

**Figure S16.** HPLC Chromatogram [Reaction condition: 20 mg CdS@NH<sub>2</sub>-MIL-125, t = 24 h, T = r.t, DBT = 100 ppm, solvent = Toluene, 12 W blue LED, under natural sunlight and oxygen gas] (Retention time 3.18 min).

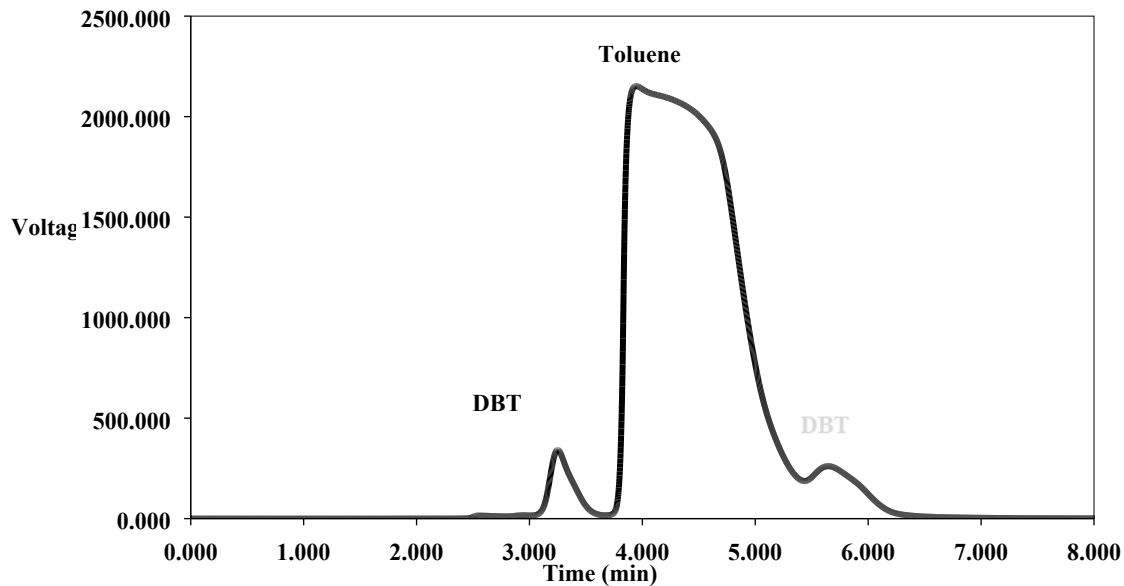

**Figure S17.** HPLC Chromatogram [Reaction condition: 20 mg CdS@NH<sub>2</sub>-MIL-125, t = 24 h, T = r.t, DBT = 100 ppm, solvent = Toluene, 12 W white CFL, under oxygen gas] (Retention time 3.18 min).

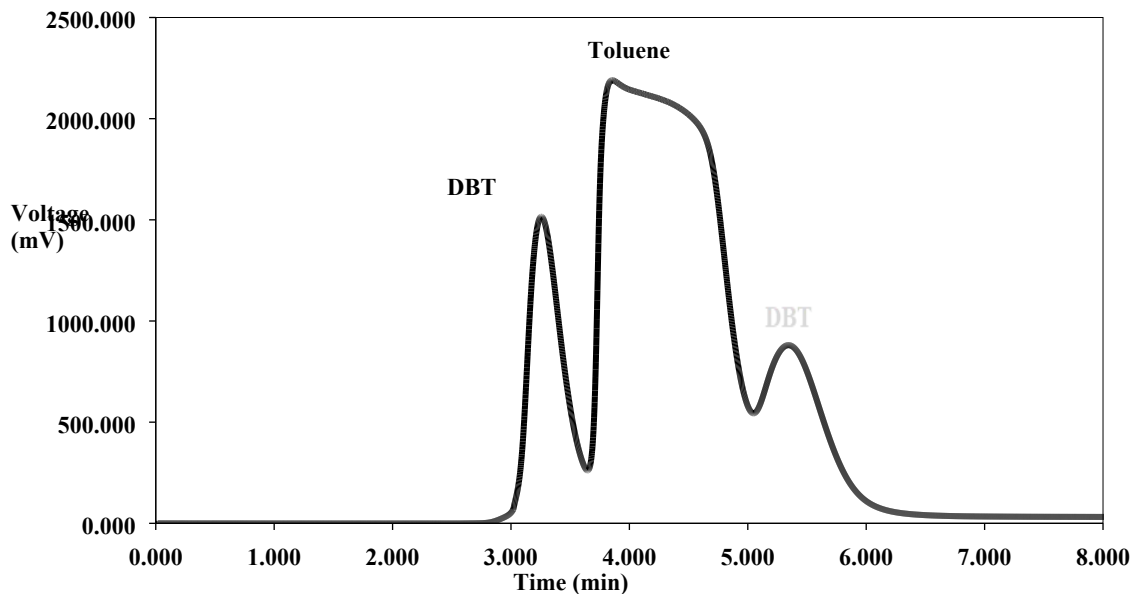

Figure 1

**Figure S18.** HPLC Chromatogram [Reaction condition: 20 mg CdS@NH<sub>2</sub>-MIL-125, t = 24 h, T = r.t, DBT = 100 ppm, solvent = Toluene, TEA scavenger under oxygen gas] (Retention time 3.18 min).

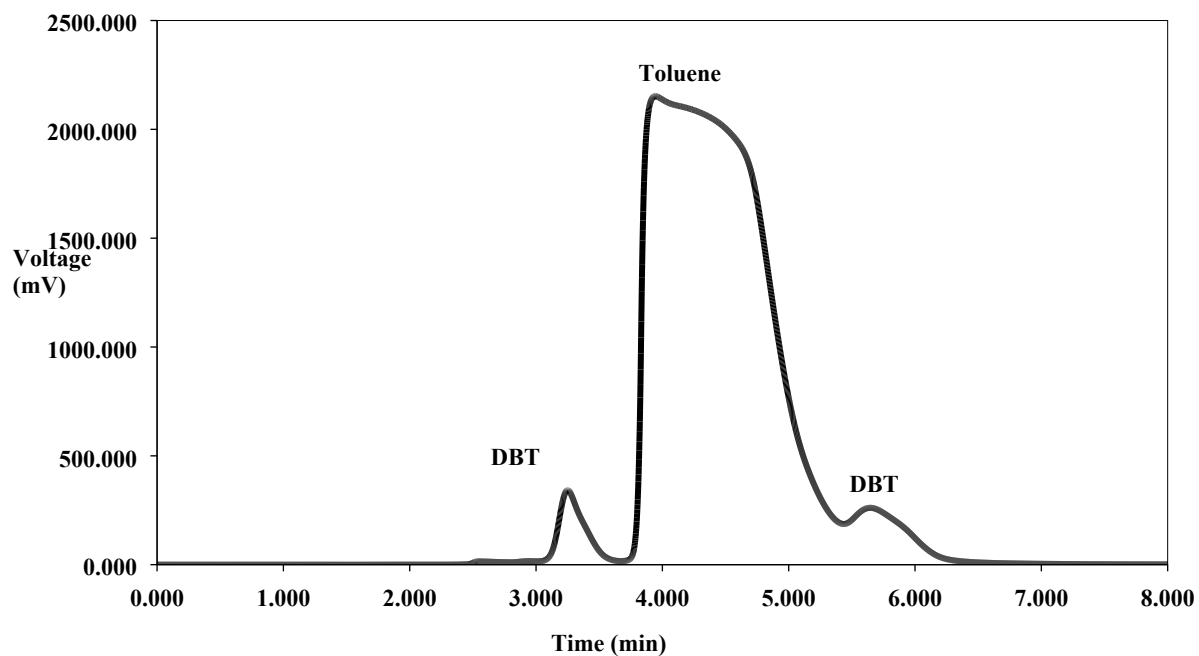

**Figure S19.** HPLC Chromatogram [Reaction condition: 20 mg CdS@NH<sub>2</sub>-MIL-125, t = 24 h, T = r.t, DBT = 100 ppm, solvent = Toluene, TEMPO scavenger under oxygen gas] (Retention time 3.18 min).

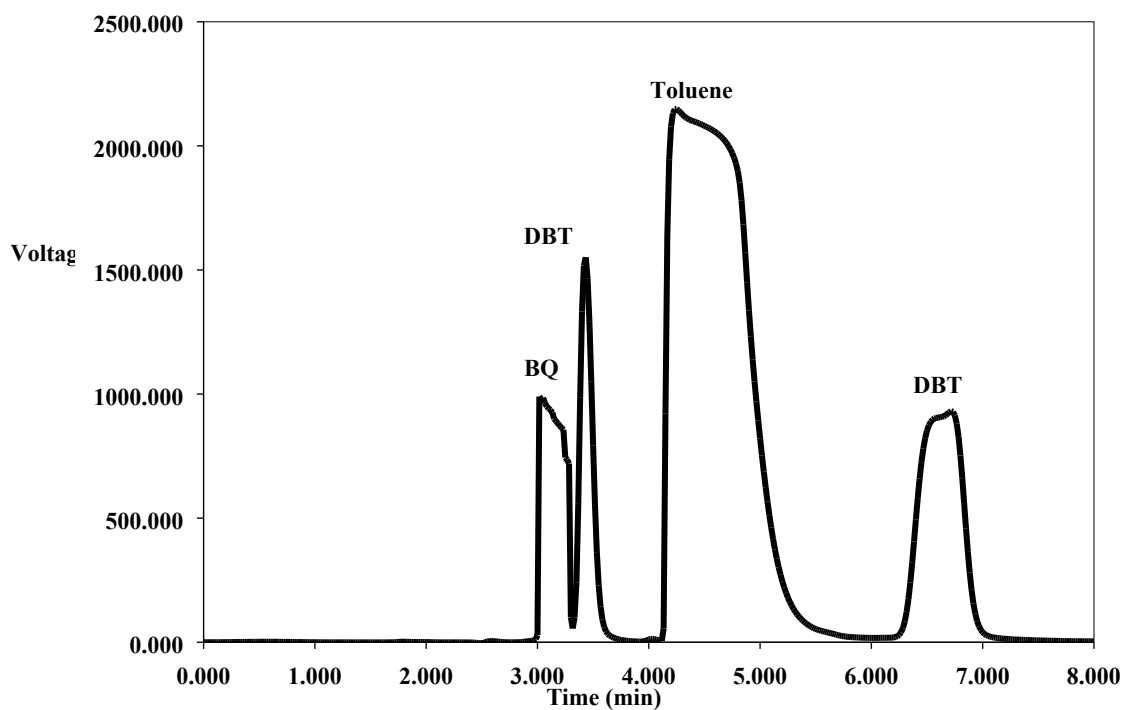

**Figure S20.** HPLC Chromatogram [Reaction condition: 20 mg CdS@NH<sub>2</sub>-MIL-125, t = 24 h, T = r.t, DBT = 100 ppm, solvent = Toluene, BQ scavenger under oxygen gas] (Retention time 3.18 min).

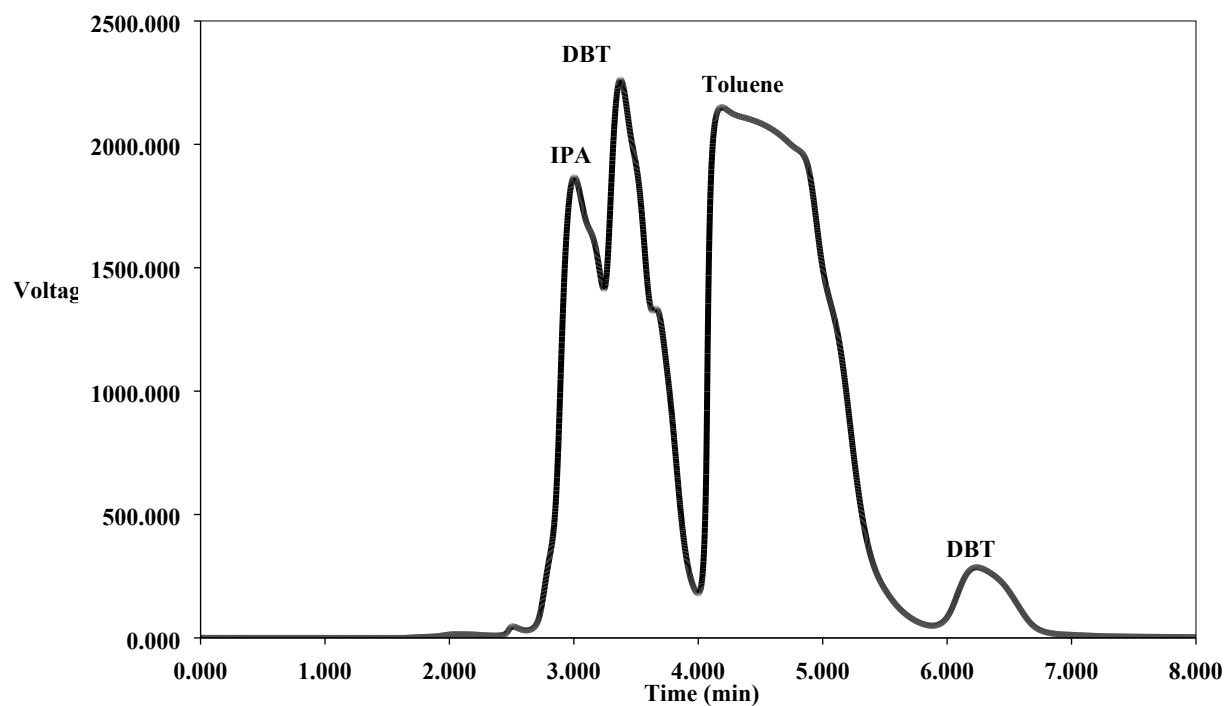

**Figure S21.** HPLC Chromatogram [Reaction condition: 20 mg CdS@NH<sub>2</sub>-MIL-125, t = 24 h, T = r.t, DBT = 100 ppm, solvent = Toluene, IPA scavenger under oxygen gas] (Retention time 3.18 min).

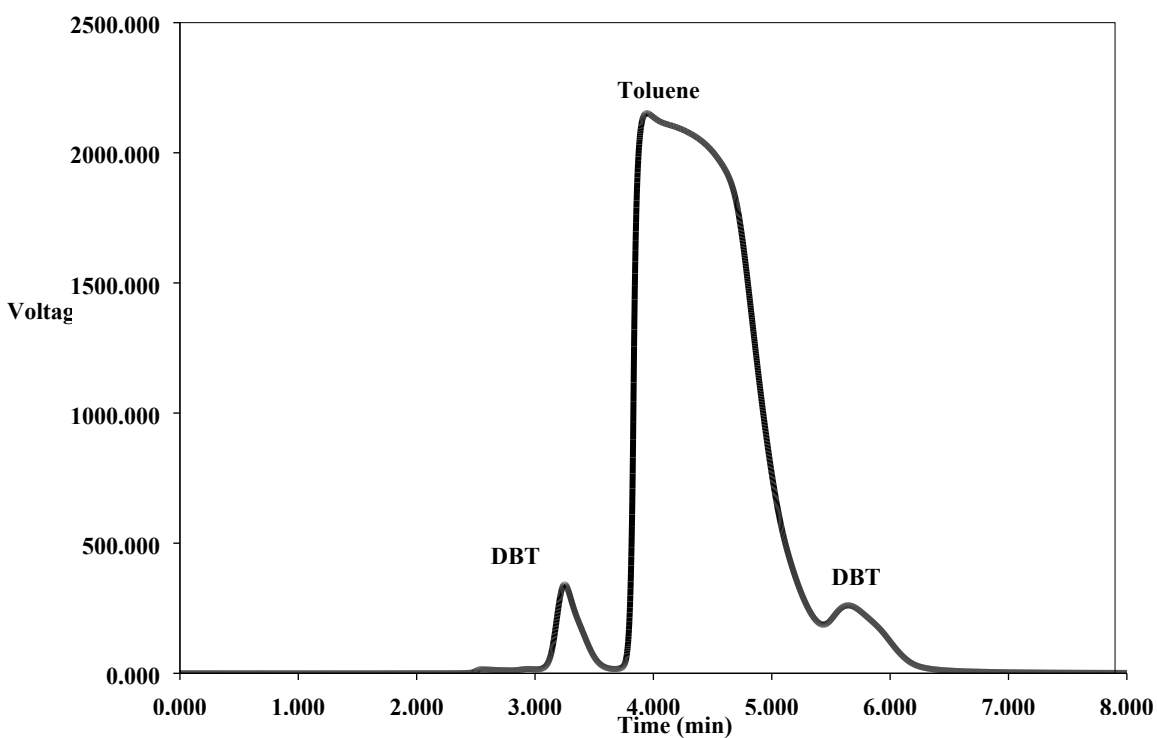

**Figure S22.** HPLC Chromatogram [Reaction condition: 20 mg CdS@NH<sub>2</sub>-MIL-125, t = 24 h, T = r.t, DBT = 100 ppm, solvent = Toluene, 4 h On under oxygen gas] (Retention time 3.18 min).

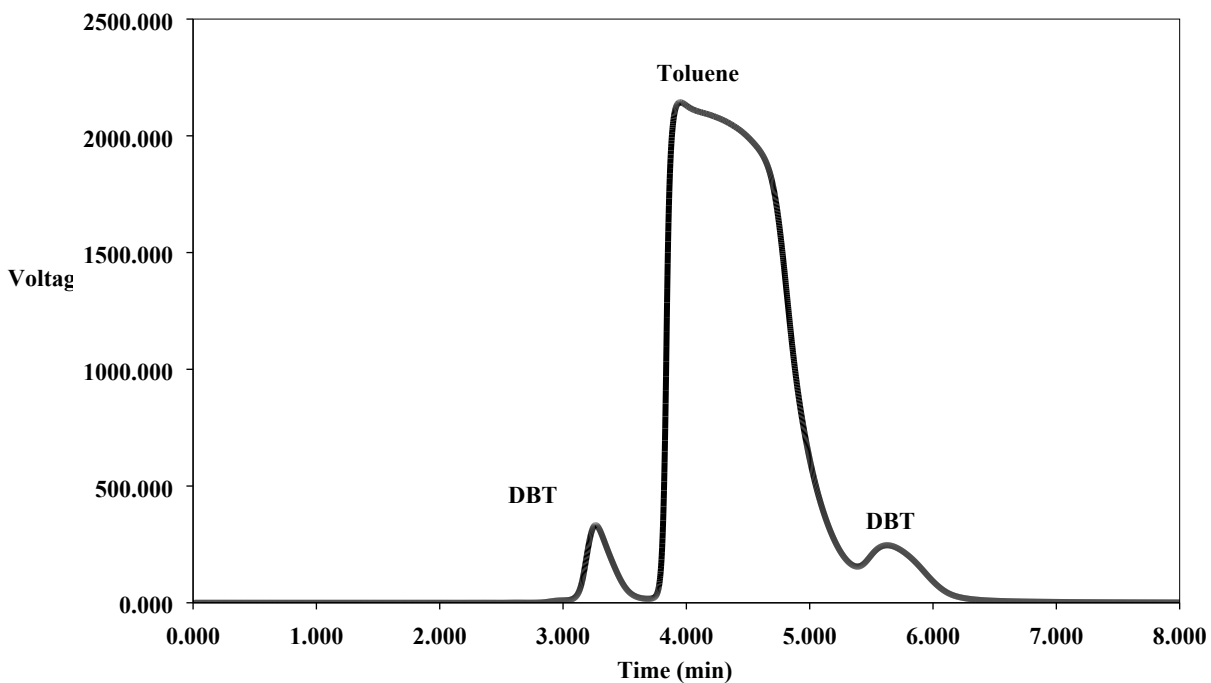

**Figure S23.** HPLC Chromatogram [Reaction condition: 20 mg CdS@NH<sub>2</sub>-MIL-125, t = 24 h, T = r.t, DBT = 100 ppm, solvent = Toluene, 3 h Off under oxygen gas] (Retention time 3.18 min).

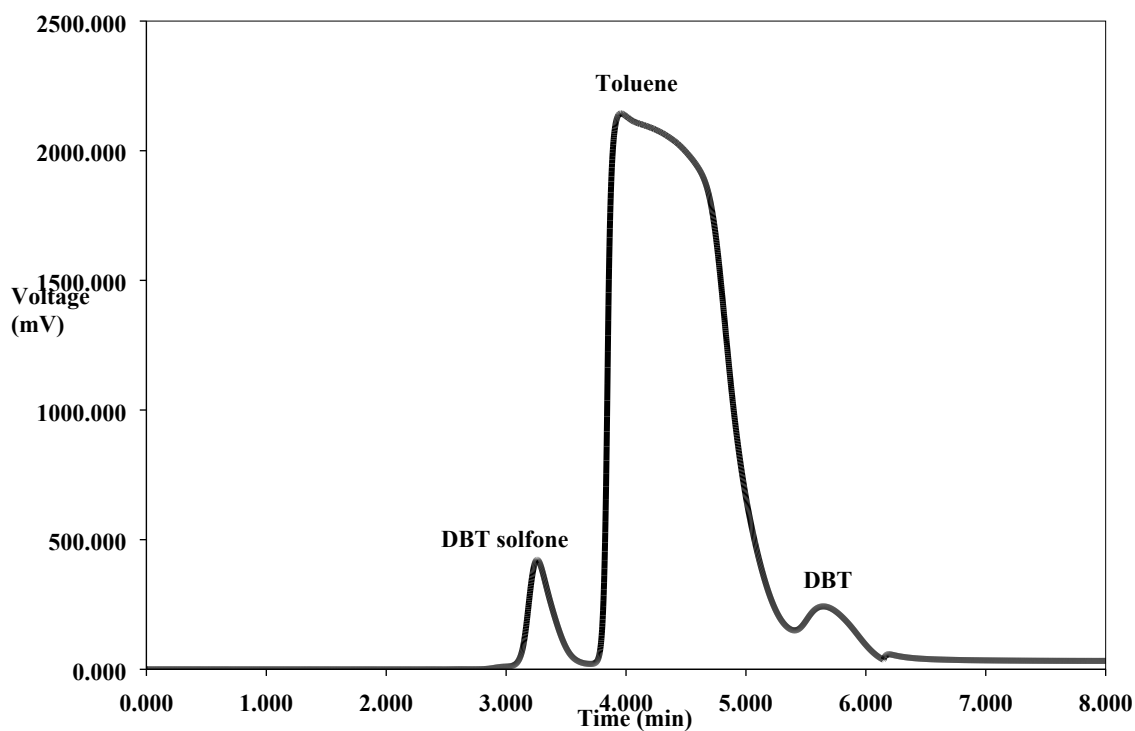



**Figure S24.** HPLC Chromatogram [Reaction condition: 20 mg CdS@NH<sub>2</sub>-MIL-125, t = 24 h, T = r.t, DBT = 100 ppm, solvent = Toluene, 3 h On under oxygen gas] (Retention time 3.18 min).

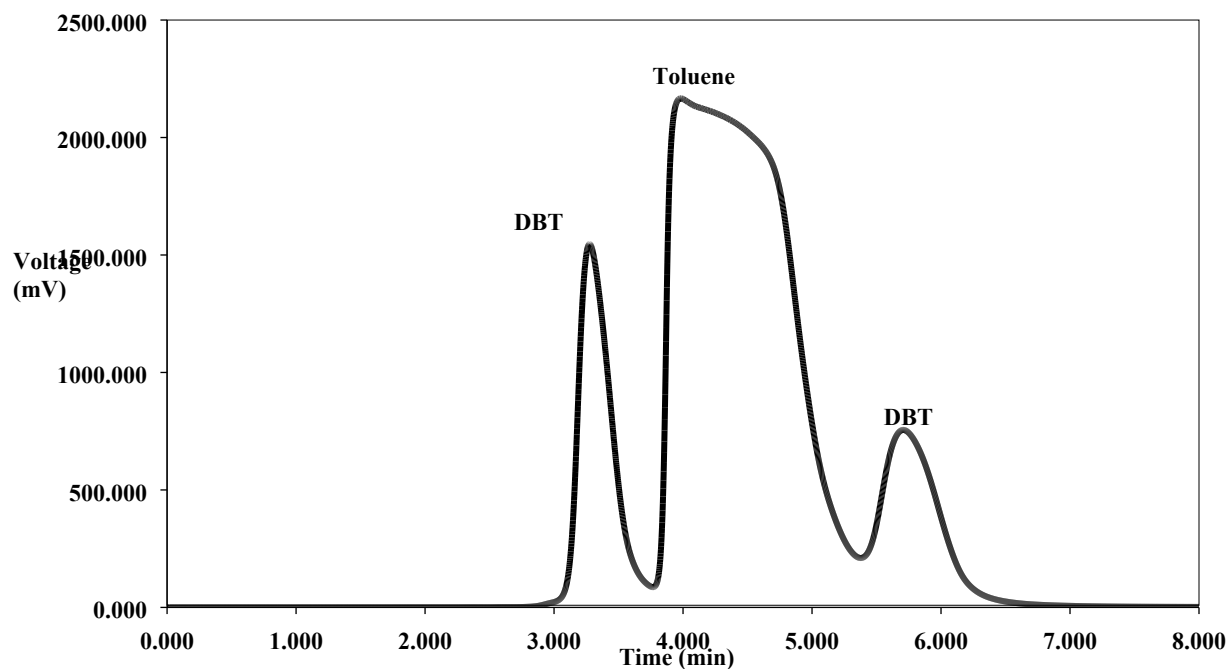

**Figure S25.** HPLC Chromatogram [Reaction condition: 20 mg CdS@NH<sub>2</sub>-MIL-125, t = 24 h, T = r.t, DBT = 100 ppm, solvent = Toluene, 3 h Off under oxygen gas] (Retention time 3.18 min).

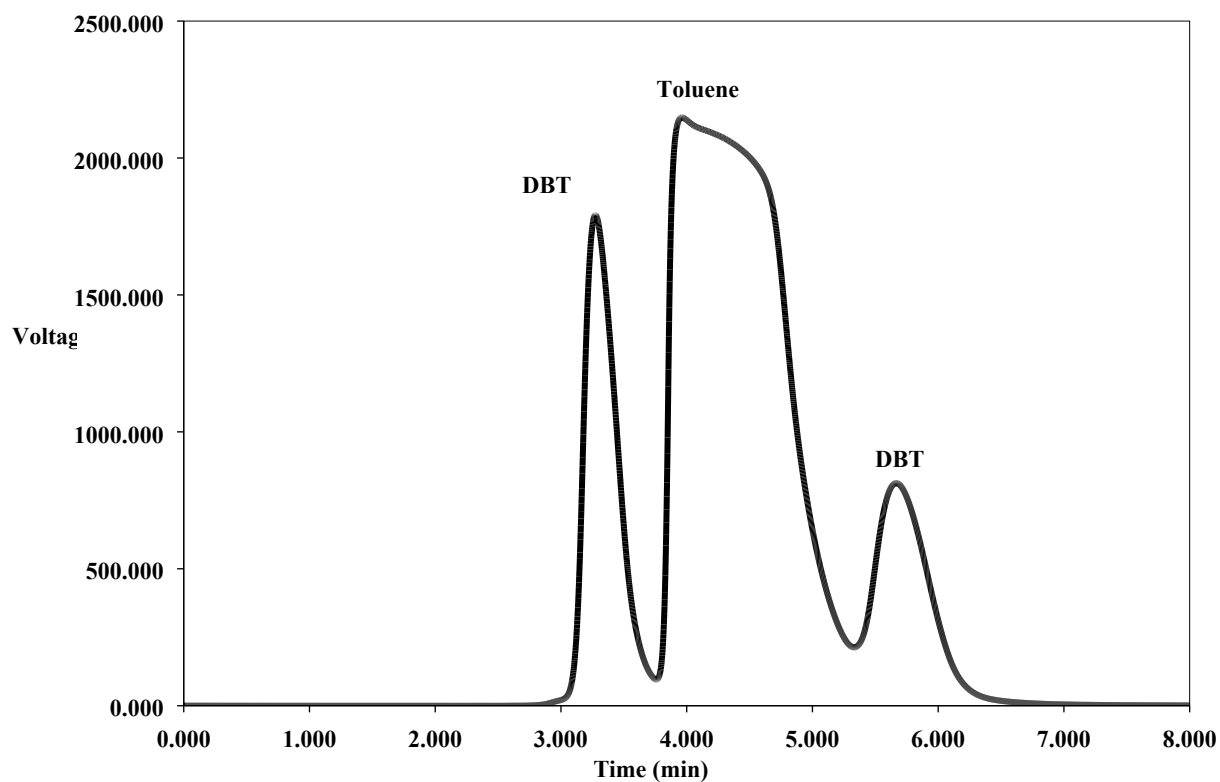

**Figure S26.** HPLC Chromatogram [Reaction condition: 20 mg CdS@NH<sub>2</sub>-MIL-125, t = 24 h, T = r.t, DBT = 500 ppm, solvent = Toluene, 3 h On under oxygen gas] (Retention time 3.18 min)

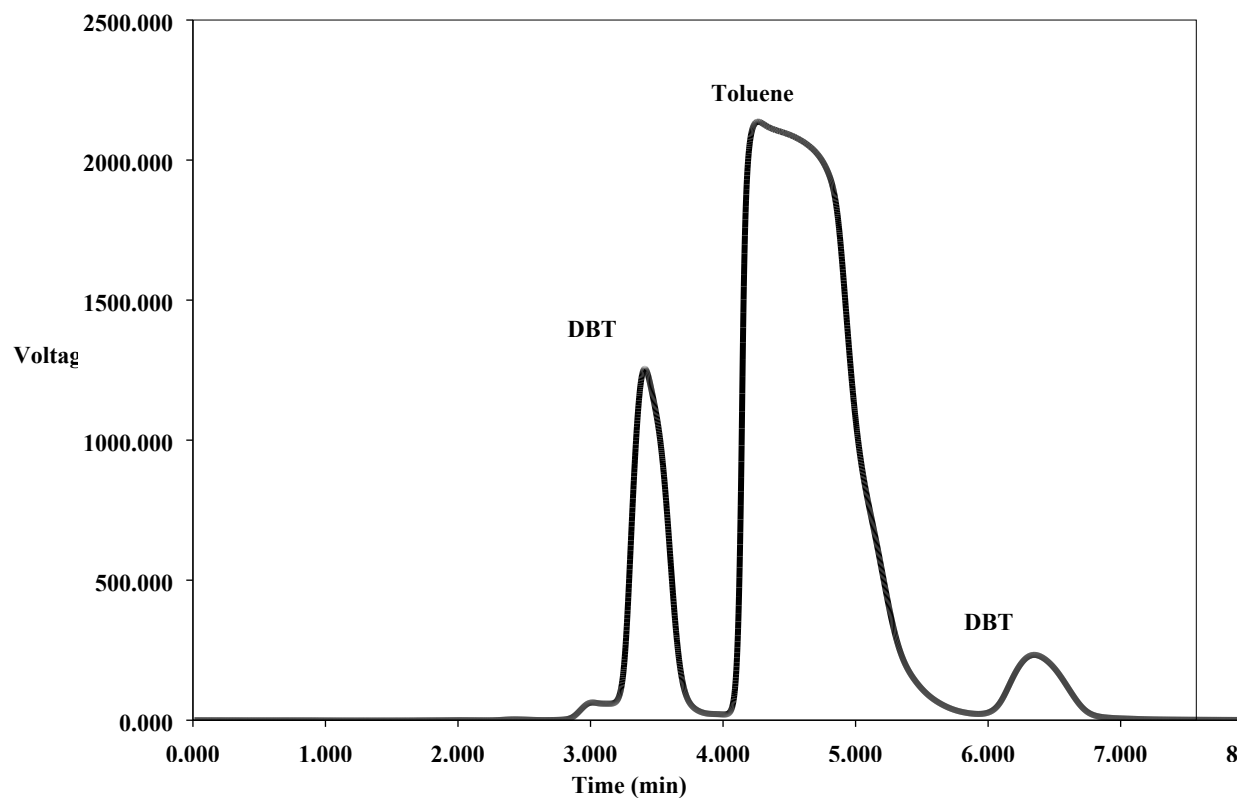

**Figure S27.** HPLC Chromatogram [Reaction condition: 20 mg recycled photocatalyst after 5 runs, t = 24 h, T = r.t, DBT = 100 ppm, solvent = Toluene, under oxygen gas] (Retention time 3.18 min).

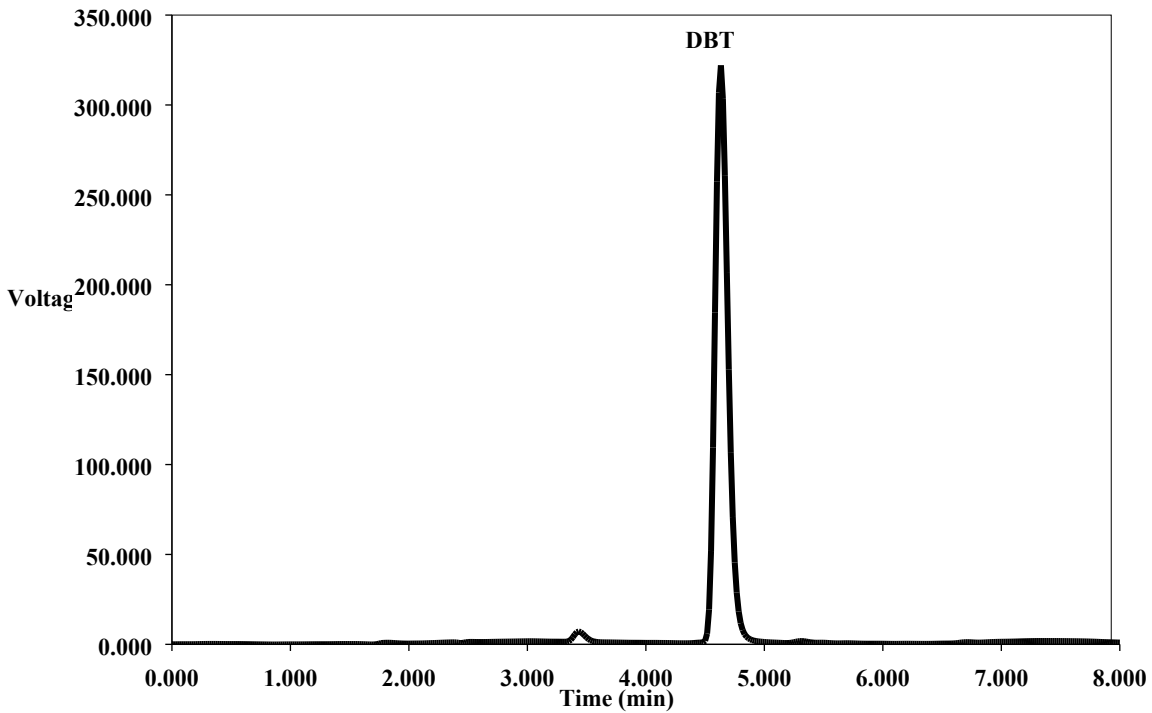

**Figure S28.** HPLC Chromatogram of 100 ppm standard of dibenzothiophene in CH<sub>3</sub>CN as solvent (Retention time 4.5-5 min).

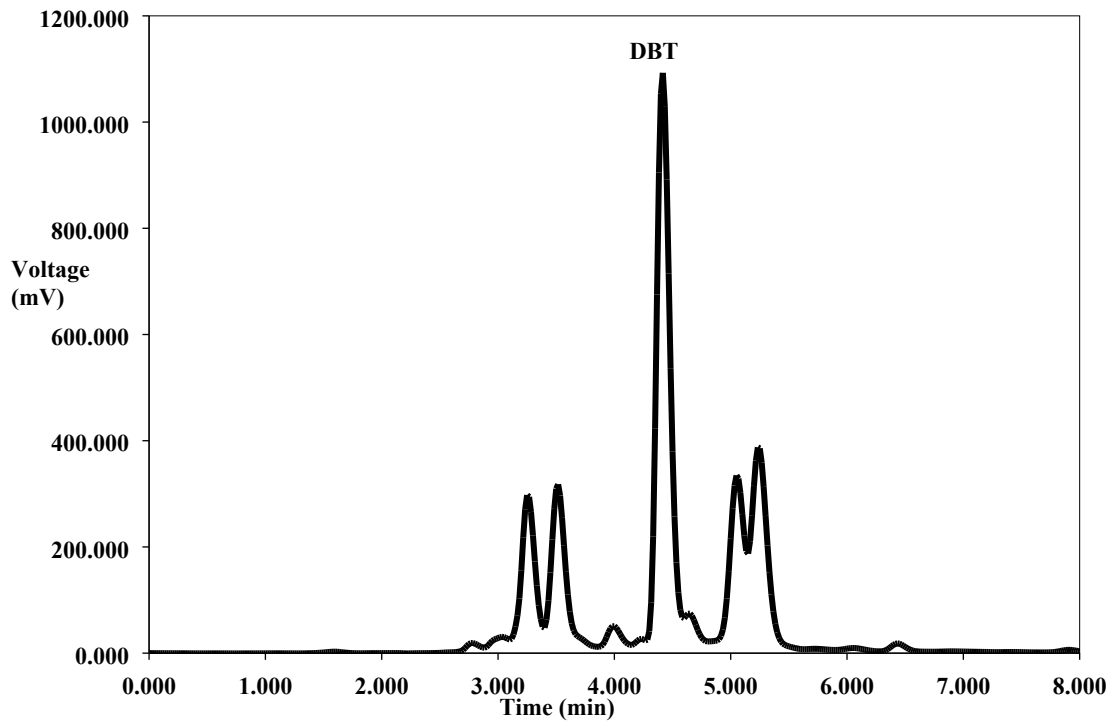

**Figure S29.** HPLC Chromatogram [Reaction condition: 20 mg CdS@NH<sub>2</sub>-MIL-125, t = 24 h, T = r.t, DBT = 100 ppm, solvent = CH<sub>3</sub>CN ,12 W blue LED, under oxygen gas] (Retention time 3.18-5.5 min)

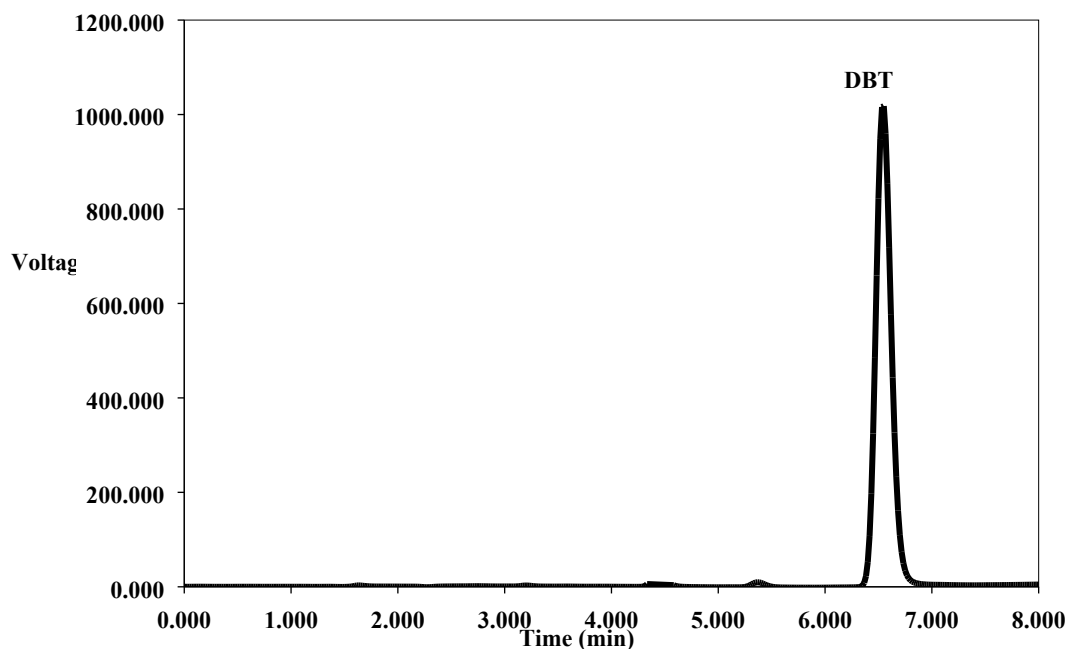

**Figure S30.** HPLC Chromatogram of 100 ppm standard of dibenzothiophene in EtOH as solvent (retention time 6.5-7 min).

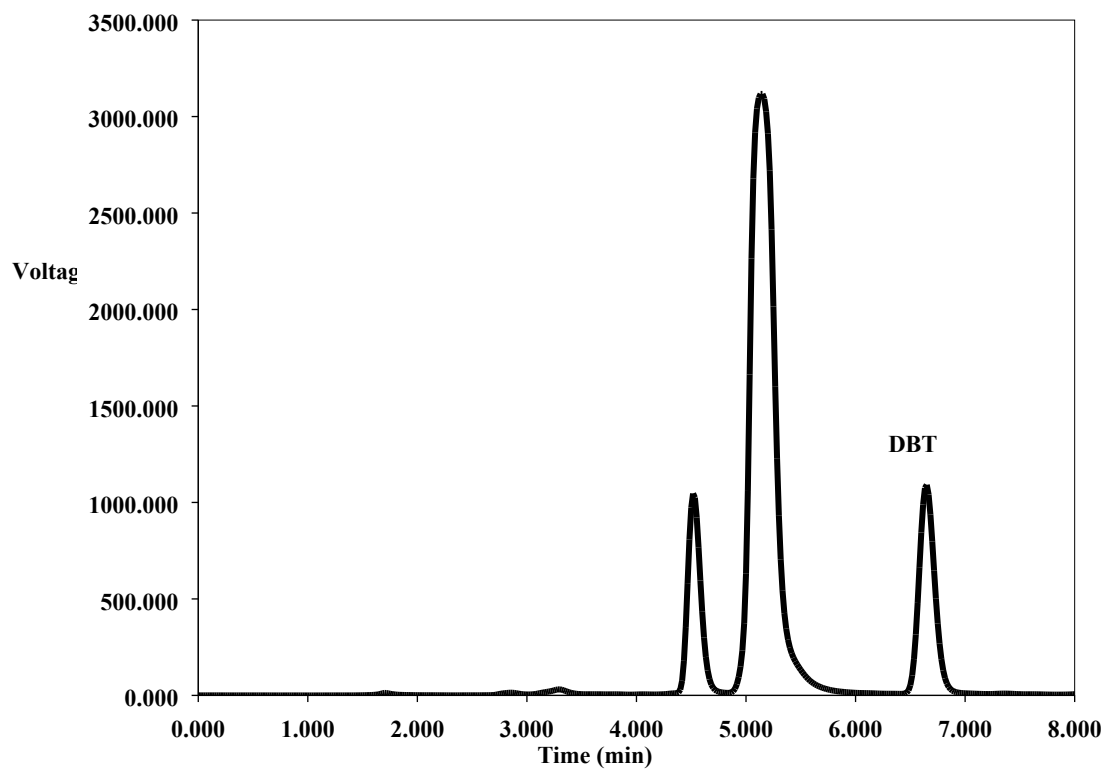

**Figure S31.** HPLC Chromatogram [Reaction condition: 20 mg CdS@NH<sub>2</sub>-MIL-125, t = 24 h, T = r.t, DBT = 100 ppm, solvent = EtOH, 12 W blue LED, under oxygen gas] (Retention time 4.5-6 min)

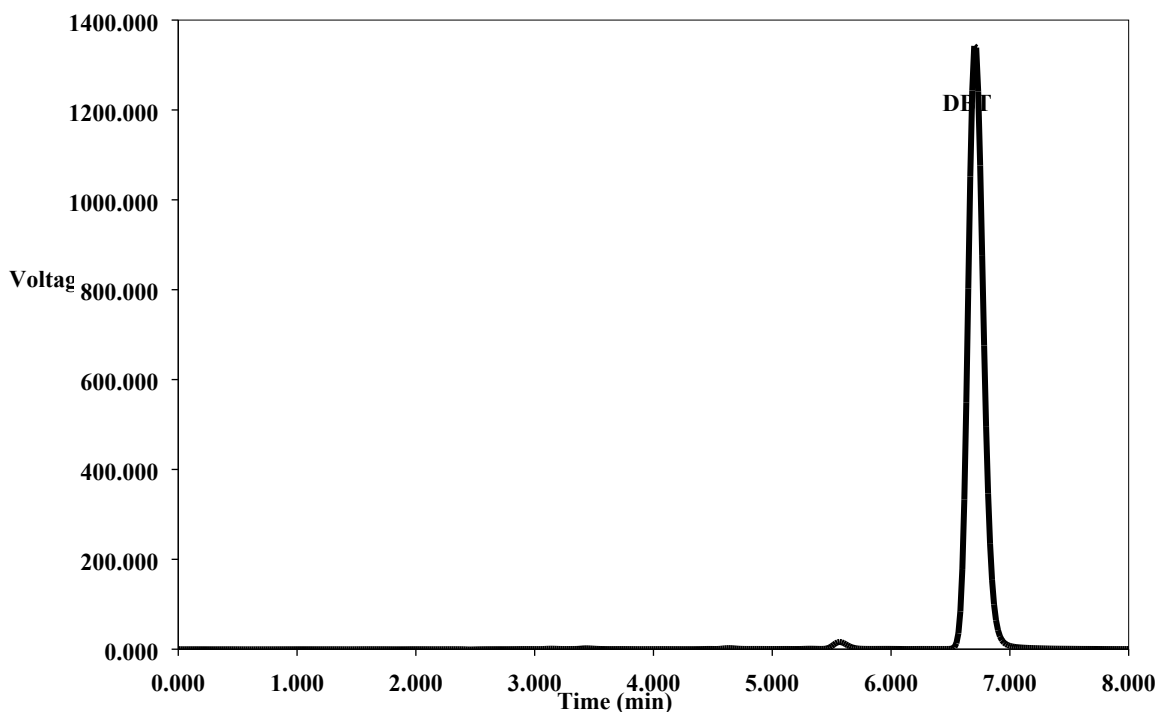

**Figure S32.** HPLC Chromatogram of 100 ppm standard of dibenzothiophene in *n*-Octane as solvent (retention time 6.5-7 min).

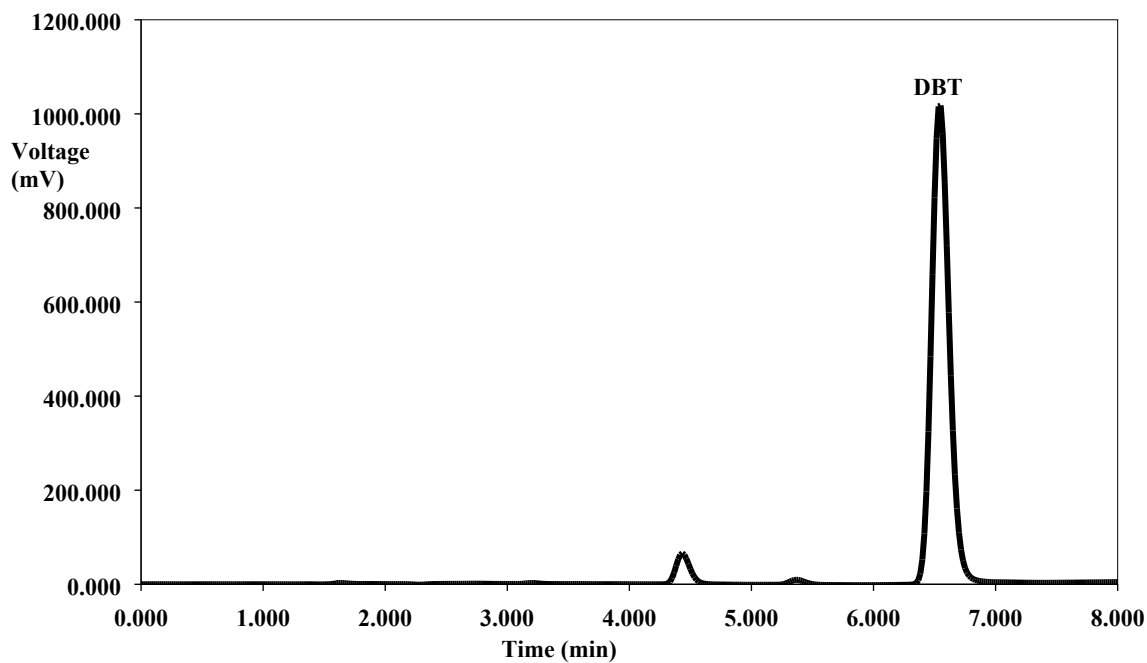

**Figure S33.** HPLC Chromatogram [Reaction condition: 20 mg CdS@NH<sub>2</sub>-MIL-125, t = 24 h, T = r.t, DBT = 100 ppm, solvent = *n*-Octane, 12 W blue LED, under oxygen gas] (Retention time 6.5-7 min)

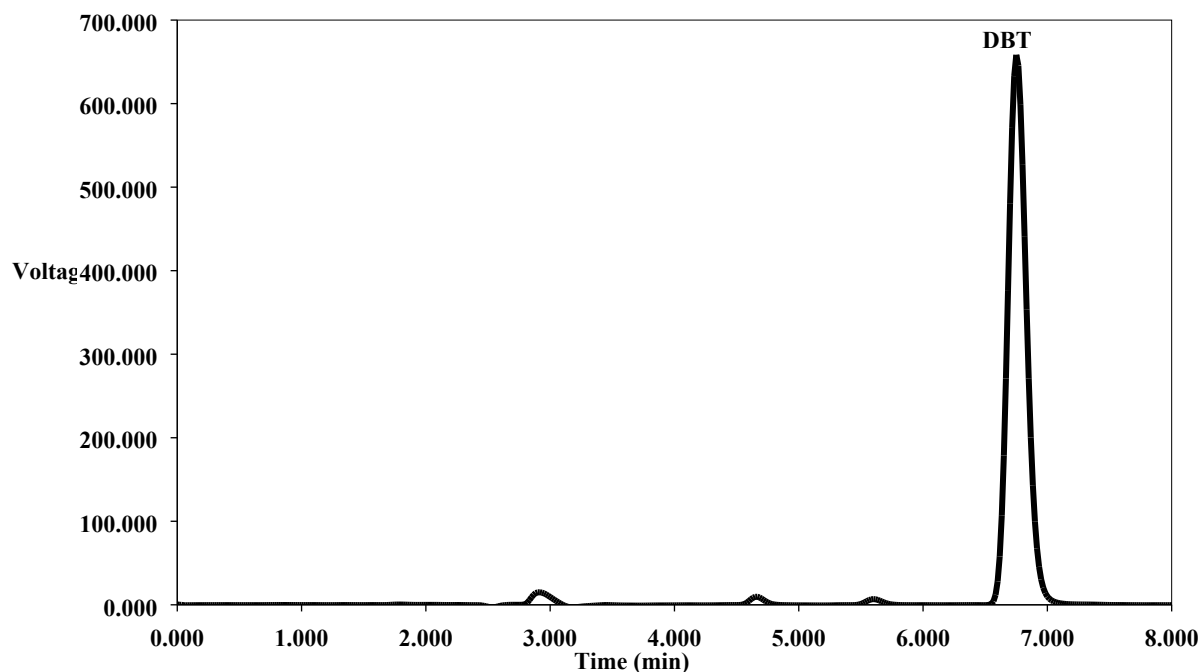

**Figure S34.** HPLC Chromatogram [Reaction condition: 20 mg CdS@NH<sub>2</sub>-MIL-125, t = 24 h, T = r.t, DBT = 100 ppm, solvent = *n*-Octane/H<sub>2</sub>O (98:2), 12 W blue LED, under oxygen gas] (Retention time 6.5-7 min)

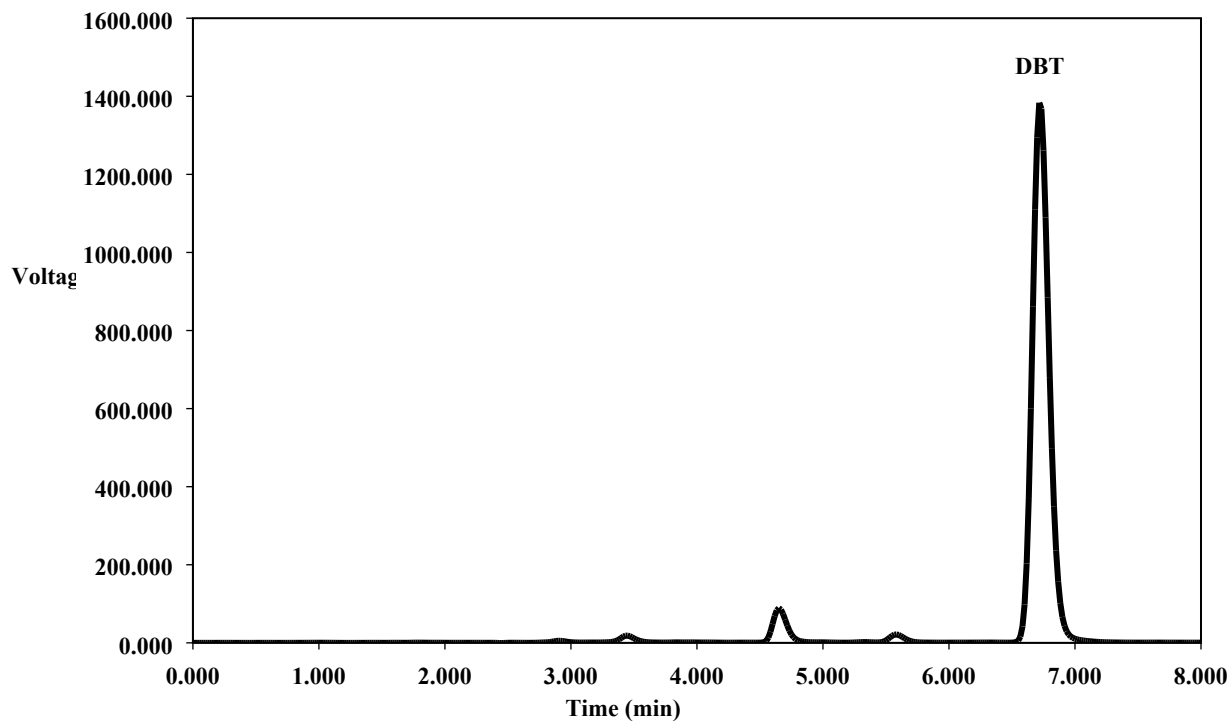

**Figure S35.** HPLC Chromatogram [Reaction condition: 20 mg CdS@NH<sub>2</sub>-MIL-125, t = 24 h, T = r.t, DBT = 100 ppm, solvent = *n*-Octane/CH<sub>3</sub>CN (98:2), 12 W blue LED, under oxygen gas] (Retention time 6.5-7 min)

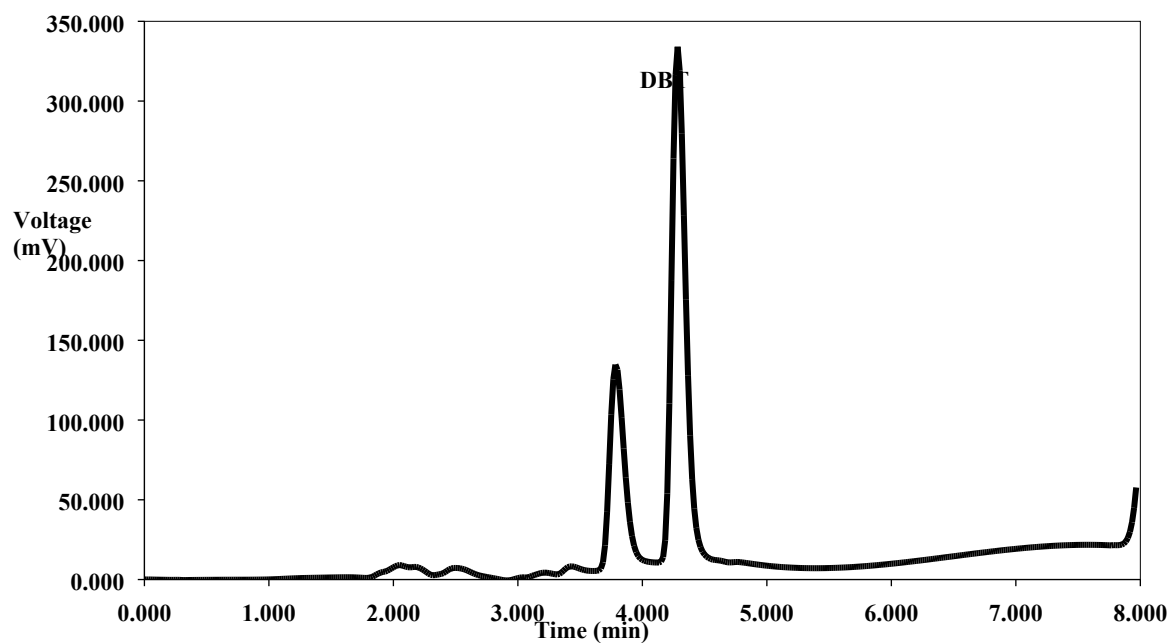

**Figure S36.** HPLC Chromatogram [Reaction condition: 20 mg CdS@NH<sub>2</sub>-MIL-125, t = 24 h, T = r.t, DBT = 100 ppm, solvent = CH<sub>3</sub>CN /Toluene (98:2), 12 W blue LED, under oxygen gas] (Retention time 4.5-6 min)

## References

1. J. Robertson, T. Bandoz, Photooxidation of dibenzothiophene on TiO<sub>2</sub>/hectorite thin films layered catalyst, *J. Colloid Interface Sci.*, 2006, **299.1**, 125-135.
